# Supplementary material for: SmartEye and Polhemus data for vestibulo–ocular reflex and optokinetic reflex model
Source: PubMed Central journal article supplement (PMC5996827; doi:10.1016/j.dib.2018.03.097), 2018-03-27
Supplement: mmc1.pdf [file mmc1.pdf]

## Conflicts of Interest Statement

**Manuscript title:** SmartEye and Polhemus data for vestibulo-ocular reflex and optokinetic reflex model

- All authors have participated in (a) conception and design, or analysis and interpretation of the data; (b) drafting the article or revising it critically for important intellectual content; and (c) approval of the final version.
- The Article I have submitted to the journal for review is original, has been written by the stated authors and has not been published elsewhere.
- The Images that I have submitted to the journal for review are original, was taken by the stated authors, and has not been published elsewhere.
- This manuscript has not been submitted to, nor is under review at, another journal or other publishing venue.
- The authors have no affiliation with any organization with a direct or indirect financial interest in the subject matter discussed in the manuscript
- The below authors have affiliations with organizations with direct or indirect financial interest in the subject matter discussed in the manuscript:

**This statement is signed by all the authors to indicate agreement that the above information is true and correct.**

| Author's name | Author's signature                                                                  | Date      |
|---------------|-------------------------------------------------------------------------------------|-----------|
| LE ANH SON    | 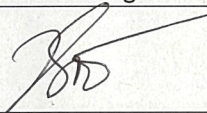 | 19/3/2018 |
| HIROFUMI AOKI |  | 19/3/2018 |
